# Supplementary material for: Enhancing mitosis quantification and detection in meningiomas with computational digital pathology
Source: PubMed Central journal article supplement (PMC10782692; doi:10.1186/s40478-023-01707-6), 2024-01-11
Supplement: 40478_2023_1707_MOESM4_ESM.pdf [file 40478_2023_1707_MOESM4_ESM.pdf]

## **Mitosis Annotations for the 48 High-Power Field Images in the User Study**

Red arrow: mitosis

H&E (1HPF, 0.16mm<sup>2</sup>)



Phosphorylated Histone H3 (0.16mm<sup>2</sup>)



Red arrow: mitosis

H&E (1HPF, 0.16mm<sup>2</sup>)



Phosphorylated Histone H3 (0.16mm<sup>2</sup>)



Red arrow: mitosis

H&E (1HPF, 0.16mm<sup>2</sup>)



Phosphorylated Histone H3 (0.16mm<sup>2</sup>)



Red arrow: mitosis

H&E (1HPF, 0.16mm<sup>2</sup>)



Phosphorylated Histone H3 (0.16mm<sup>2</sup>)



Red arrow: mitosis

H&E (1HPF, 0.16mm<sup>2</sup>)



Phosphorylated Histone H3 (0.16mm<sup>2</sup>)



Red arrow: mitosis

H&E (1HPF, 0.16mm<sup>2</sup>)



Phosphorylated Histone H3 (0.16mm<sup>2</sup>)



Red arrow: mitosis

H&E (1HPF, 0.16mm<sup>2</sup>)



Phosphorylated Histone H3 (0.16mm<sup>2</sup>)



Red arrow: mitosis

H&E (1HPF, 0.16mm<sup>2</sup>)



Phosphorylated Histone H3 (0.16mm<sup>2</sup>)



Red arrow: mitosis

H&E (1HPF, 0.16mm<sup>2</sup>)



Phosphorylated Histone H3 (0.16mm<sup>2</sup>)



Red arrow: mitosis

H&E (1HPF, 0.16mm<sup>2</sup>)



Phosphorylated Histone H3 (0.16mm<sup>2</sup>)



Red arrow: mitosis

H&E (1HPF, 0.16mm<sup>2</sup>)



Phosphorylated Histone H3 (0.16mm<sup>2</sup>)



Red arrow: mitosis

H&E (1HPF, 0.16mm<sup>2</sup>)



Phosphorylated Histone H3 (0.16mm<sup>2</sup>)



Red arrow: mitosis

H&E (1HPF, 0.16mm<sup>2</sup>)



Phosphorylated Histone H3 (0.16mm<sup>2</sup>)



Red arrow: mitosis

H&E (1HPF, 0.16mm<sup>2</sup>)



Phosphorylated Histone H3 (0.16mm<sup>2</sup>)





Red arrow: mitosis

H&E (1HPF, 0.16mm<sup>2</sup>)



Phosphorylated Histone H3 (0.16mm<sup>2</sup>)



Red arrow: mitosis

H&E (1HPF, 0.16mm<sup>2</sup>)



Phosphorylated Histone H3 (0.16mm<sup>2</sup>)



Red arrow: mitosis

H&E (1HPF, 0.16mm<sup>2</sup>)



Phosphorylated Histone H3 (0.16mm<sup>2</sup>)



Red arrow: mitosis

H&E (1HPF, 0.16mm<sup>2</sup>)



Phosphorylated Histone H3 (0.16mm<sup>2</sup>)



Red arrow: mitosis

H&E (1HPF, 0.16mm<sup>2</sup>)



Phosphorylated Histone H3 (0.16mm<sup>2</sup>)



Red arrow: mitosis

H&E (1HPF, 0.16mm<sup>2</sup>)



Phosphorylated Histone H3 (0.16mm<sup>2</sup>)



Red arrow: mitosis

H&E (1HPF, 0.16mm<sup>2</sup>)



Phosphorylated Histone H3 (0.16mm<sup>2</sup>)



Red arrow: mitosis

H&E (1HPF, 0.16mm<sup>2</sup>)



Phosphorylated Histone H3 (0.16mm<sup>2</sup>)



Red arrow: mitosis

H&E (1HPF, 0.16mm<sup>2</sup>)



Phosphorylated Histone H3 (0.16mm<sup>2</sup>)



Red arrow: mitosis

H&E (1HPF, 0.16mm<sup>2</sup>)



Phosphorylated Histone H3 (0.16mm<sup>2</sup>)



Red arrow: mitosis

H&E (1HPF, 0.16mm<sup>2</sup>)



Phosphorylated Histone H3 (0.16mm<sup>2</sup>)



Red arrow: mitosis

H&E (1HPF, 0.16mm<sup>2</sup>)



Phosphorylated Histone H3 (0.16mm<sup>2</sup>)



Red arrow: mitosis

H&E (1HPF, 0.16mm<sup>2</sup>)



Phosphorylated Histone H3 (0.16mm<sup>2</sup>)



Red arrow: mitosis

H&E (1HPF, 0.16mm<sup>2</sup>)



Phosphorylated Histone H3 (0.16mm<sup>2</sup>)



Red arrow: mitosis

H&E (1HPF, 0.16mm<sup>2</sup>)



Phosphorylated Histone H3 (0.16mm<sup>2</sup>)



Red arrow: mitosis

H&E (1HPF, 0.16mm<sup>2</sup>)



Phosphorylated Histone H3 (0.16mm<sup>2</sup>)





Red arrow: mitosis

H&E (1HPF, 0.16mm<sup>2</sup>)



Phosphorylated Histone H3 (0.16mm<sup>2</sup>)



Red arrow: mitosis

H&E (1HPF, 0.16mm<sup>2</sup>)



Phosphorylated Histone H3 (0.16mm<sup>2</sup>)



Red arrow: mitosis

H&E (1HPF, 0.16mm<sup>2</sup>)



Phosphorylated Histone H3 (0.16mm<sup>2</sup>)



Red arrow: mitosis

H&E (1HPF, 0.16mm<sup>2</sup>)



Phosphorylated Histone H3 (0.16mm<sup>2</sup>)



Red arrow: mitosis

H&E (1HPF, 0.16mm<sup>2</sup>)



Phosphorylated Histone H3 (0.16mm<sup>2</sup>)



Red arrow: mitosis

H&E (1HPF, 0.16mm<sup>2</sup>)



Phosphorylated Histone H3 (0.16mm<sup>2</sup>)



Red arrow: mitosis

H&E (1HPF, 0.16mm<sup>2</sup>)



Phosphorylated Histone H3 (0.16mm<sup>2</sup>)



Red arrow: mitosis

H&E (1HPF, 0.16mm<sup>2</sup>)



Phosphorylated Histone H3 (0.16mm<sup>2</sup>)



Red arrow: mitosis

H&E (1HPF, 0.16mm<sup>2</sup>)



Phosphorylated Histone H3 (0.16mm<sup>2</sup>)



Red arrow: mitosis

H&E (1HPF, 0.16mm<sup>2</sup>)



Phosphorylated Histone H3 (0.16mm<sup>2</sup>)



Red arrow: mitosis

H&E (1HPF, 0.16mm<sup>2</sup>)



Phosphorylated Histone H3 (0.16mm<sup>2</sup>)



Red arrow: mitosis

H&E (1HPF, 0.16mm<sup>2</sup>)



Phosphorylated Histone H3 (0.16mm<sup>2</sup>)



Red arrow: mitosis

H&E (1HPF, 0.16mm<sup>2</sup>)



Phosphorylated Histone H3 (0.16mm<sup>2</sup>)



Red arrow: mitosis

H&E (1HPF, 0.16mm<sup>2</sup>)



Phosphorylated Histone H3 (0.16mm<sup>2</sup>)



Red arrow: mitosis

H&E (1HPF, 0.16mm<sup>2</sup>)



Phosphorylated Histone H3 (0.16mm<sup>2</sup>)



Red arrow: mitosis

H&E (1HPF, 0.16mm<sup>2</sup>)



Phosphorylated Histone H3 (0.16mm<sup>2</sup>)





Red arrow: mitosis

H&E (1HPF, 0.16mm<sup>2</sup>)



Phosphorylated Histone H3 (0.16mm<sup>2</sup>)



Red arrow: mitosis

H&E (1HPF, 0.16mm<sup>2</sup>)



Phosphorylated Histone H3 (0.16mm<sup>2</sup>)
