# Supplementary material for: Enhancing mitosis quantification and detection in meningiomas with computational digital pathology
Source: PubMed Central journal article supplement (PMC10782692; doi:10.1186/s40478-023-01707-6), 2024-01-11
Supplement: 40478_2023_1707_MOESM5_ESM.pdf [file 40478_2023_1707_MOESM5_ESM.pdf]

## AI Typical Performance

**Test Run ID: 4278c769-9c50-4f67-a275-d6fa5ab92705**

**(Random result pulled from 100 test runs)**

**AI Result:** TP=72, FP=6, FN=16, Precision=0.923, Recall/Sensitivity=0.818, F1=0.867

**Time to Finish:** 1 minute 15 seconds

### Nomenclature

- **Ground truth:** mitotic events on H&E after referencing Phosphorylated Histone H3 (PHH3) IHC staining;
- **TP:** true positive, you labeled a ground truth mitosis correctly;
- **FP:** false positive, no ground truth mitosis is within 15 $\mu$ m of your label;
- **FN:** false negative, you did not label within 15 $\mu$ m of a ground truth mitosis;
- **Recall/Sensitivity:**  $TP / (TP + FN)$
- **Precision:**  $TP / (TP + FP)$
- **F1:**  $2 * Precision * Recall / (Precision + Recall)$

Green arrow: correct (True Positive)  
Red arrow: missed mitosis (False Negative)  
Blue arrow: wrong label (False Positive)

H&E (1HPF, 0.16mm<sup>2</sup>)



Phosphorylated Histone H3 (0.16mm<sup>2</sup>)



Green arrow: correct (True Positive)  
Red arrow: missed mitosis (False Negative)  
Blue arrow: wrong label (False Positive)

H&E (1HPF, 0.16mm<sup>2</sup>)



Phosphorylated Histone H3 (0.16mm<sup>2</sup>)



Green arrow: correct (True Positive)  
Red arrow: missed mitosis (False Negative)  
Blue arrow: wrong label (False Positive)

H&E (1HPF, 0.16mm<sup>2</sup>)



Phosphorylated Histone H3 (0.16mm<sup>2</sup>)



Green arrow: correct (True Positive)  
Red arrow: missed mitosis (False Negative)  
Blue arrow: wrong label (False Positive)

H&E (1HPF, 0.16mm<sup>2</sup>)



Phosphorylated Histone H3 (0.16mm<sup>2</sup>)



Green arrow: correct (True Positive)  
Red arrow: missed mitosis (False Negative)  
Blue arrow: wrong label (False Positive)

H&E (1HPF, 0.16mm<sup>2</sup>)



Phosphorylated Histone H3 (0.16mm<sup>2</sup>)



Green arrow: correct (True Positive)  
Red arrow: missed mitosis (False Negative)  
Blue arrow: wrong label (False Positive)

H&E (1HPF, 0.16mm<sup>2</sup>)



Phosphorylated Histone H3 (0.16mm<sup>2</sup>)



Green arrow: correct (True Positive)  
Red arrow: missed mitosis (False Negative)  
Blue arrow: wrong label (False Positive)

H&E (1HPF, 0.16mm<sup>2</sup>)



Phosphorylated Histone H3 (0.16mm<sup>2</sup>)



Green arrow: correct (True Positive)  
Red arrow: missed mitosis (False Negative)  
Blue arrow: wrong label (False Positive)

H&E (1HPF, 0.16mm<sup>2</sup>)



Phosphorylated Histone H3 (0.16mm<sup>2</sup>)



Green arrow: correct (True Positive)  
Red arrow: missed mitosis (False Negative)  
Blue arrow: wrong label (False Positive)

H&E (1HPF, 0.16mm<sup>2</sup>)



Phosphorylated Histone H3 (0.16mm<sup>2</sup>)



Green arrow: correct (True Positive)  
Red arrow: missed mitosis (False Negative)  
Blue arrow: wrong label (False Positive)

H&E (1HPF, 0.16mm<sup>2</sup>)



Phosphorylated Histone H3 (0.16mm<sup>2</sup>)



Green arrow: correct (True Positive)  
Red arrow: missed mitosis (False Negative)  
Blue arrow: wrong label (False Positive)

H&E (1HPF, 0.16mm<sup>2</sup>)



Phosphorylated Histone H3 (0.16mm<sup>2</sup>)



Green arrow: correct (True Positive)  
Red arrow: missed mitosis (False Negative)  
Blue arrow: wrong label (False Positive)

H&E (1HPF, 0.16mm<sup>2</sup>)



Phosphorylated Histone H3 (0.16mm<sup>2</sup>)



Green arrow: correct (True Positive)  
Red arrow: missed mitosis (False Negative)  
Blue arrow: wrong label (False Positive)

H&E (1HPF, 0.16mm<sup>2</sup>)



Phosphorylated Histone H3 (0.16mm<sup>2</sup>)



Green arrow: correct (True Positive)  
Red arrow: missed mitosis (False Negative)  
Blue arrow: wrong label (False Positive)

H&E (1HPF, 0.16mm<sup>2</sup>)



Phosphorylated Histone H3 (0.16mm<sup>2</sup>)





Green arrow: correct (True Positive)  
Red arrow: missed mitosis (False Negative)  
Blue arrow: wrong label (False Positive)

H&E (1HPF, 0.16mm<sup>2</sup>)



Phosphorylated Histone H3 (0.16mm<sup>2</sup>)



Green arrow: correct (True Positive)  
Red arrow: missed mitosis (False Negative)  
Blue arrow: wrong label (False Positive)

H&E (1HPF, 0.16mm<sup>2</sup>)



Phosphorylated Histone H3 (0.16mm<sup>2</sup>)



Green arrow: correct (True Positive)  
Red arrow: missed mitosis (False Negative)  
Blue arrow: wrong label (False Positive)

H&E (1HPF, 0.16mm<sup>2</sup>)



Phosphorylated Histone H3 (0.16mm<sup>2</sup>)



Green arrow: correct (True Positive)  
Red arrow: missed mitosis (False Negative)  
Blue arrow: wrong label (False Positive)

H&E (1HPF, 0.16mm<sup>2</sup>)



Phosphorylated Histone H3 (0.16mm<sup>2</sup>)



Green arrow: correct (True Positive)  
Red arrow: missed mitosis (False Negative)  
Blue arrow: wrong label (False Positive)

H&E (1HPF, 0.16mm<sup>2</sup>)



Phosphorylated Histone H3 (0.16mm<sup>2</sup>)



Green arrow: correct (True Positive)  
Red arrow: missed mitosis (False Negative)  
Blue arrow: wrong label (False Positive)

H&E (1HPF, 0.16mm<sup>2</sup>)



Phosphorylated Histone H3 (0.16mm<sup>2</sup>)



Green arrow: correct (True Positive)  
Red arrow: missed mitosis (False Negative)  
Blue arrow: wrong label (False Positive)

H&E (1HPF, 0.16mm<sup>2</sup>)



Phosphorylated Histone H3 (0.16mm<sup>2</sup>)



Green arrow: correct (True Positive)  
Red arrow: missed mitosis (False Negative)  
Blue arrow: wrong label (False Positive)

H&E (1HPF, 0.16mm<sup>2</sup>)



Phosphorylated Histone H3 (0.16mm<sup>2</sup>)



Green arrow: correct (True Positive)  
Red arrow: missed mitosis (False Negative)  
Blue arrow: wrong label (False Positive)

H&E (1HPF, 0.16mm<sup>2</sup>)



Phosphorylated Histone H3 (0.16mm<sup>2</sup>)



Green arrow: correct (True Positive)  
Red arrow: missed mitosis (False Negative)  
Blue arrow: wrong label (False Positive)

H&E (1HPF, 0.16mm<sup>2</sup>)



Phosphorylated Histone H3 (0.16mm<sup>2</sup>)



Green arrow: correct (True Positive)  
Red arrow: missed mitosis (False Negative)  
Blue arrow: wrong label (False Positive)

H&E (1HPF, 0.16mm<sup>2</sup>)



Phosphorylated Histone H3 (0.16mm<sup>2</sup>)



Green arrow: correct (True Positive)  
Red arrow: missed mitosis (False Negative)  
Blue arrow: wrong label (False Positive)

H&E (1HPF, 0.16mm<sup>2</sup>)



Phosphorylated Histone H3 (0.16mm<sup>2</sup>)



Green arrow: correct (True Positive)  
Red arrow: missed mitosis (False Negative)  
Blue arrow: wrong label (False Positive)

H&E (1HPF, 0.16mm<sup>2</sup>)



Phosphorylated Histone H3 (0.16mm<sup>2</sup>)



Green arrow: correct (True Positive)  
Red arrow: missed mitosis (False Negative)  
Blue arrow: wrong label (False Positive)

H&E (1HPF, 0.16mm<sup>2</sup>)



Phosphorylated Histone H3 (0.16mm<sup>2</sup>)



Green arrow: correct (True Positive)  
Red arrow: missed mitosis (False Negative)  
Blue arrow: wrong label (False Positive)

H&E (1HPF, 0.16mm<sup>2</sup>)



Phosphorylated Histone H3 (0.16mm<sup>2</sup>)



Green arrow: correct (True Positive)  
Red arrow: missed mitosis (False Negative)  
Blue arrow: wrong label (False Positive)

H&E (1HPF, 0.16mm<sup>2</sup>)



Phosphorylated Histone H3 (0.16mm<sup>2</sup>)





Green arrow: correct (True Positive)  
Red arrow: missed mitosis (False Negative)  
Blue arrow: wrong label (False Positive)

H&E (1HPF, 0.16mm<sup>2</sup>)



Phosphorylated Histone H3 (0.16mm<sup>2</sup>)



Green arrow: correct (True Positive)  
Red arrow: missed mitosis (False Negative)  
Blue arrow: wrong label (False Positive)

H&E (1HPF, 0.16mm<sup>2</sup>)



Phosphorylated Histone H3 (0.16mm<sup>2</sup>)



Green arrow: correct (True Positive)  
Red arrow: missed mitosis (False Negative)  
Blue arrow: wrong label (False Positive)

H&E (1HPF, 0.16mm<sup>2</sup>)



Phosphorylated Histone H3 (0.16mm<sup>2</sup>)



Green arrow: correct (True Positive)  
Red arrow: missed mitosis (False Negative)  
Blue arrow: wrong label (False Positive)

H&E (1HPF, 0.16mm<sup>2</sup>)



Phosphorylated Histone H3 (0.16mm<sup>2</sup>)



Green arrow: correct (True Positive)  
Red arrow: missed mitosis (False Negative)  
Blue arrow: wrong label (False Positive)

H&E (1HPF, 0.16mm<sup>2</sup>)



Phosphorylated Histone H3 (0.16mm<sup>2</sup>)



Green arrow: correct (True Positive)  
Red arrow: missed mitosis (False Negative)  
Blue arrow: wrong label (False Positive)

H&E (1HPF, 0.16mm<sup>2</sup>)



Phosphorylated Histone H3 (0.16mm<sup>2</sup>)



Green arrow: correct (True Positive)  
Red arrow: missed mitosis (False Negative)  
Blue arrow: wrong label (False Positive)

H&E (1HPF, 0.16mm<sup>2</sup>)



Phosphorylated Histone H3 (0.16mm<sup>2</sup>)



Green arrow: correct (True Positive)  
Red arrow: missed mitosis (False Negative)  
Blue arrow: wrong label (False Positive)

H&E (1HPF, 0.16mm<sup>2</sup>)



Phosphorylated Histone H3 (0.16mm<sup>2</sup>)



Green arrow: correct (True Positive)  
Red arrow: missed mitosis (False Negative)  
Blue arrow: wrong label (False Positive)

H&E (1HPF, 0.16mm<sup>2</sup>)



Phosphorylated Histone H3 (0.16mm<sup>2</sup>)



Green arrow: correct (True Positive)  
Red arrow: missed mitosis (False Negative)  
Blue arrow: wrong label (False Positive)

H&E (1HPF, 0.16mm<sup>2</sup>)



Phosphorylated Histone H3 (0.16mm<sup>2</sup>)



Green arrow: correct (True Positive)  
Red arrow: missed mitosis (False Negative)  
Blue arrow: wrong label (False Positive)

H&E (1HPF, 0.16mm<sup>2</sup>)



Phosphorylated Histone H3 (0.16mm<sup>2</sup>)



Green arrow: correct (True Positive)  
Red arrow: missed mitosis (False Negative)  
Blue arrow: wrong label (False Positive)

H&E (1HPF, 0.16mm<sup>2</sup>)



Phosphorylated Histone H3 (0.16mm<sup>2</sup>)



Green arrow: correct (True Positive)  
Red arrow: missed mitosis (False Negative)  
Blue arrow: wrong label (False Positive)

H&E (1HPF, 0.16mm<sup>2</sup>)



Phosphorylated Histone H3 (0.16mm<sup>2</sup>)



Green arrow: correct (True Positive)  
Red arrow: missed mitosis (False Negative)  
Blue arrow: wrong label (False Positive)

H&E (1HPF, 0.16mm<sup>2</sup>)



Phosphorylated Histone H3 (0.16mm<sup>2</sup>)



Green arrow: correct (True Positive)  
Red arrow: missed mitosis (False Negative)  
Blue arrow: wrong label (False Positive)

H&E (1HPF, 0.16mm<sup>2</sup>)



Phosphorylated Histone H3 (0.16mm<sup>2</sup>)



Green arrow: correct (True Positive)  
Red arrow: missed mitosis (False Negative)  
Blue arrow: wrong label (False Positive)

H&E (1HPF, 0.16mm<sup>2</sup>)



Phosphorylated Histone H3 (0.16mm<sup>2</sup>)





Green arrow: correct (True Positive)  
Red arrow: missed mitosis (False Negative)  
Blue arrow: wrong label (False Positive)

H&E (1HPF, 0.16mm<sup>2</sup>)



Phosphorylated Histone H3 (0.16mm<sup>2</sup>)



Green arrow: correct (True Positive)  
Red arrow: missed mitosis (False Negative)  
Blue arrow: wrong label (False Positive)

H&E (1HPF, 0.16mm<sup>2</sup>)



Phosphorylated Histone H3 (0.16mm<sup>2</sup>)
