# Supplementary material for: Enhancing mitosis quantification and detection in meningiomas with computational digital pathology
Source: PubMed Central journal article supplement (PMC10782692; doi:10.1186/s40478-023-01707-6), 2024-01-11
Supplement: 40478_2023_1707_MOESM6_ESM.pdf [file 40478_2023_1707_MOESM6_ESM.pdf]

## Participant ID: 2b0577d1-e8ae-4d0a-bc75-7fcf3cfa39d7

**Your Result:** TP=67, FP=7, FN=21, Precision=0.905, Recall/Sensitivity=0.761, F1=0.827

**Time to Finish:** 22 minutes 58 seconds

### Nomenclature

- **Ground truth:** mitotic events on H&E after referencing Phosphorylated Histone H3 (PHH3) IHC staining;
- **TP:** true positive, you labeled a ground truth mitosis correctly;
- **FP:** false positive, no ground truth mitosis is within 15 $\mu$ m of your label;
- **FN:** false negative, you did not label within 15 $\mu$ m of a ground truth mitosis;
- **Recall/Sensitivity:**  $TP / (TP + FN)$
- **Precision:**  $TP / (TP + FP)$
- **F1:**  $2 * Precision * Recall / (Precision + Recall)$

Green arrow: correct (True Positive)  
Red arrow: missed mitosis (False Negative)  
Blue arrow: wrong label (False Positive)

H&E (1HPF, 0.16mm<sup>2</sup>)



Phosphorylated Histone H3 (0.16mm<sup>2</sup>)



Green arrow: correct (True Positive)  
Red arrow: missed mitosis (False Negative)  
Blue arrow: wrong label (False Positive)

H&E (1HPF, 0.16mm<sup>2</sup>)



Phosphorylated Histone H3 (0.16mm<sup>2</sup>)



Green arrow: correct (True Positive)  
Red arrow: missed mitosis (False Negative)  
Blue arrow: wrong label (False Positive)

H&E (1HPF, 0.16mm<sup>2</sup>)



Phosphorylated Histone H3 (0.16mm<sup>2</sup>)



Green arrow: correct (True Positive)  
Red arrow: missed mitosis (False Negative)  
Blue arrow: wrong label (False Positive)

H&E (1HPF, 0.16mm<sup>2</sup>)



Phosphorylated Histone H3 (0.16mm<sup>2</sup>)



Green arrow: correct (True Positive)  
Red arrow: missed mitosis (False Negative)  
Blue arrow: wrong label (False Positive)

H&E (1HPF, 0.16mm<sup>2</sup>)



Phosphorylated Histone H3 (0.16mm<sup>2</sup>)



Green arrow: correct (True Positive)  
Red arrow: missed mitosis (False Negative)  
Blue arrow: wrong label (False Positive)

H&E (1HPF, 0.16mm<sup>2</sup>)



Phosphorylated Histone H3 (0.16mm<sup>2</sup>)



Green arrow: correct (True Positive)  
Red arrow: missed mitosis (False Negative)  
Blue arrow: wrong label (False Positive)

H&E (1HPF, 0.16mm<sup>2</sup>)



Phosphorylated Histone H3 (0.16mm<sup>2</sup>)



Green arrow: correct (True Positive)  
Red arrow: missed mitosis (False Negative)  
Blue arrow: wrong label (False Positive)

H&E (1HPF, 0.16mm<sup>2</sup>)



Phosphorylated Histone H3 (0.16mm<sup>2</sup>)



Green arrow: correct (True Positive)  
Red arrow: missed mitosis (False Negative)  
Blue arrow: wrong label (False Positive)

H&E (1HPF, 0.16mm<sup>2</sup>)



Phosphorylated Histone H3 (0.16mm<sup>2</sup>)



Green arrow: correct (True Positive)  
Red arrow: missed mitosis (False Negative)  
Blue arrow: wrong label (False Positive)

H&E (1HPF, 0.16mm<sup>2</sup>)



Phosphorylated Histone H3 (0.16mm<sup>2</sup>)



Green arrow: correct (True Positive)  
Red arrow: missed mitosis (False Negative)  
Blue arrow: wrong label (False Positive)

H&E (1HPF, 0.16mm<sup>2</sup>)



Phosphorylated Histone H3 (0.16mm<sup>2</sup>)



Green arrow: correct (True Positive)  
Red arrow: missed mitosis (False Negative)  
Blue arrow: wrong label (False Positive)

H&E (1HPF, 0.16mm<sup>2</sup>)



Phosphorylated Histone H3 (0.16mm<sup>2</sup>)



Green arrow: correct (True Positive)  
Red arrow: missed mitosis (False Negative)  
Blue arrow: wrong label (False Positive)

H&E (1HPF, 0.16mm<sup>2</sup>)



Phosphorylated Histone H3 (0.16mm<sup>2</sup>)



Green arrow: correct (True Positive)  
Red arrow: missed mitosis (False Negative)  
Blue arrow: wrong label (False Positive)

H&E (1HPF, 0.16mm<sup>2</sup>)



Phosphorylated Histone H3 (0.16mm<sup>2</sup>)





Green arrow: correct (True Positive)  
Red arrow: missed mitosis (False Negative)  
Blue arrow: wrong label (False Positive)

H&E (1HPF, 0.16mm<sup>2</sup>)



Phosphorylated Histone H3 (0.16mm<sup>2</sup>)



Green arrow: correct (True Positive)  
Red arrow: missed mitosis (False Negative)  
Blue arrow: wrong label (False Positive)

H&E (1HPF, 0.16mm<sup>2</sup>)



Phosphorylated Histone H3 (0.16mm<sup>2</sup>)



Green arrow: correct (True Positive)  
Red arrow: missed mitosis (False Negative)  
Blue arrow: wrong label (False Positive)

H&E (1HPF, 0.16mm<sup>2</sup>)



Phosphorylated Histone H3 (0.16mm<sup>2</sup>)



Green arrow: correct (True Positive)  
Red arrow: missed mitosis (False Negative)  
Blue arrow: wrong label (False Positive)

H&E (1HPF, 0.16mm<sup>2</sup>)



Phosphorylated Histone H3 (0.16mm<sup>2</sup>)



Green arrow: correct (True Positive)  
Red arrow: missed mitosis (False Negative)  
Blue arrow: wrong label (False Positive)

H&E (1HPF, 0.16mm<sup>2</sup>)



Phosphorylated Histone H3 (0.16mm<sup>2</sup>)



Green arrow: correct (True Positive)  
Red arrow: missed mitosis (False Negative)  
Blue arrow: wrong label (False Positive)

H&E (1HPF, 0.16mm<sup>2</sup>)



Phosphorylated Histone H3 (0.16mm<sup>2</sup>)



Green arrow: correct (True Positive)  
Red arrow: missed mitosis (False Negative)  
Blue arrow: wrong label (False Positive)

H&E (1HPF, 0.16mm<sup>2</sup>)



Phosphorylated Histone H3 (0.16mm<sup>2</sup>)



Green arrow: correct (True Positive)  
Red arrow: missed mitosis (False Negative)  
Blue arrow: wrong label (False Positive)

H&E (1HPF, 0.16mm<sup>2</sup>)



Phosphorylated Histone H3 (0.16mm<sup>2</sup>)



Green arrow: correct (True Positive)  
Red arrow: missed mitosis (False Negative)  
Blue arrow: wrong label (False Positive)

H&E (1HPF, 0.16mm<sup>2</sup>)



Phosphorylated Histone H3 (0.16mm<sup>2</sup>)



Green arrow: correct (True Positive)  
Red arrow: missed mitosis (False Negative)  
Blue arrow: wrong label (False Positive)

H&E (1HPF, 0.16mm<sup>2</sup>)



Phosphorylated Histone H3 (0.16mm<sup>2</sup>)



Green arrow: correct (True Positive)  
Red arrow: missed mitosis (False Negative)  
Blue arrow: wrong label (False Positive)

H&E (1HPF, 0.16mm<sup>2</sup>)



Phosphorylated Histone H3 (0.16mm<sup>2</sup>)



Green arrow: correct (True Positive)  
Red arrow: missed mitosis (False Negative)  
Blue arrow: wrong label (False Positive)

H&E (1HPF, 0.16mm<sup>2</sup>)



Phosphorylated Histone H3 (0.16mm<sup>2</sup>)



Green arrow: correct (True Positive)  
Red arrow: missed mitosis (False Negative)  
Blue arrow: wrong label (False Positive)

H&E (1HPF, 0.16mm<sup>2</sup>)



Phosphorylated Histone H3 (0.16mm<sup>2</sup>)



Green arrow: correct (True Positive)  
Red arrow: missed mitosis (False Negative)  
Blue arrow: wrong label (False Positive)

H&E (1HPF, 0.16mm<sup>2</sup>)



Phosphorylated Histone H3 (0.16mm<sup>2</sup>)



Green arrow: correct (True Positive)  
Red arrow: missed mitosis (False Negative)  
Blue arrow: wrong label (False Positive)

H&E (1HPF, 0.16mm<sup>2</sup>)



Phosphorylated Histone H3 (0.16mm<sup>2</sup>)



Green arrow: correct (True Positive)  
Red arrow: missed mitosis (False Negative)  
Blue arrow: wrong label (False Positive)

H&E (1HPF, 0.16mm<sup>2</sup>)



Phosphorylated Histone H3 (0.16mm<sup>2</sup>)





Green arrow: correct (True Positive)  
Red arrow: missed mitosis (False Negative)  
Blue arrow: wrong label (False Positive)

H&E (1HPF, 0.16mm<sup>2</sup>)



Phosphorylated Histone H3 (0.16mm<sup>2</sup>)



Green arrow: correct (True Positive)  
Red arrow: missed mitosis (False Negative)  
Blue arrow: wrong label (False Positive)

H&E (1HPF, 0.16mm<sup>2</sup>)



Phosphorylated Histone H3 (0.16mm<sup>2</sup>)



Green arrow: correct (True Positive)  
Red arrow: missed mitosis (False Negative)  
Blue arrow: wrong label (False Positive)

H&E (1HPF, 0.16mm<sup>2</sup>)



Phosphorylated Histone H3 (0.16mm<sup>2</sup>)



Green arrow: correct (True Positive)  
Red arrow: missed mitosis (False Negative)  
Blue arrow: wrong label (False Positive)

H&E (1HPF, 0.16mm<sup>2</sup>)



Phosphorylated Histone H3 (0.16mm<sup>2</sup>)



Green arrow: correct (True Positive)  
Red arrow: missed mitosis (False Negative)  
Blue arrow: wrong label (False Positive)

H&E (1HPF, 0.16mm<sup>2</sup>)



Phosphorylated Histone H3 (0.16mm<sup>2</sup>)



Green arrow: correct (True Positive)  
Red arrow: missed mitosis (False Negative)  
Blue arrow: wrong label (False Positive)

H&E (1HPF, 0.16mm<sup>2</sup>)



Phosphorylated Histone H3 (0.16mm<sup>2</sup>)



Green arrow: correct (True Positive)  
Red arrow: missed mitosis (False Negative)  
Blue arrow: wrong label (False Positive)

H&E (1HPF, 0.16mm<sup>2</sup>)



Phosphorylated Histone H3 (0.16mm<sup>2</sup>)



Green arrow: correct (True Positive)  
Red arrow: missed mitosis (False Negative)  
Blue arrow: wrong label (False Positive)

H&E (1HPF, 0.16mm<sup>2</sup>)



Phosphorylated Histone H3 (0.16mm<sup>2</sup>)



Green arrow: correct (True Positive)  
Red arrow: missed mitosis (False Negative)  
Blue arrow: wrong label (False Positive)

H&E (1HPF, 0.16mm<sup>2</sup>)



Phosphorylated Histone H3 (0.16mm<sup>2</sup>)



Green arrow: correct (True Positive)  
Red arrow: missed mitosis (False Negative)  
Blue arrow: wrong label (False Positive)

H&E (1HPF, 0.16mm<sup>2</sup>)



Phosphorylated Histone H3 (0.16mm<sup>2</sup>)



Green arrow: correct (True Positive)  
Red arrow: missed mitosis (False Negative)  
Blue arrow: wrong label (False Positive)

H&E (1HPF, 0.16mm<sup>2</sup>)



Phosphorylated Histone H3 (0.16mm<sup>2</sup>)



Green arrow: correct (True Positive)  
Red arrow: missed mitosis (False Negative)  
Blue arrow: wrong label (False Positive)

H&E (1HPF, 0.16mm<sup>2</sup>)



Phosphorylated Histone H3 (0.16mm<sup>2</sup>)



Green arrow: correct (True Positive)  
Red arrow: missed mitosis (False Negative)  
Blue arrow: wrong label (False Positive)

H&E (1HPF, 0.16mm<sup>2</sup>)



Phosphorylated Histone H3 (0.16mm<sup>2</sup>)



Green arrow: correct (True Positive)  
Red arrow: missed mitosis (False Negative)  
Blue arrow: wrong label (False Positive)

H&E (1HPF, 0.16mm<sup>2</sup>)



Phosphorylated Histone H3 (0.16mm<sup>2</sup>)



Green arrow: correct (True Positive)  
Red arrow: missed mitosis (False Negative)  
Blue arrow: wrong label (False Positive)

H&E (1HPF, 0.16mm<sup>2</sup>)



Phosphorylated Histone H3 (0.16mm<sup>2</sup>)



Green arrow: correct (True Positive)  
Red arrow: missed mitosis (False Negative)  
Blue arrow: wrong label (False Positive)

H&E (1HPF, 0.16mm<sup>2</sup>)



Phosphorylated Histone H3 (0.16mm<sup>2</sup>)





Green arrow: correct (True Positive)  
Red arrow: missed mitosis (False Negative)  
Blue arrow: wrong label (False Positive)

H&E (1HPF, 0.16mm<sup>2</sup>)



Phosphorylated Histone H3 (0.16mm<sup>2</sup>)



Green arrow: correct (True Positive)  
Red arrow: missed mitosis (False Negative)  
Blue arrow: wrong label (False Positive)

H&E (1HPF, 0.16mm<sup>2</sup>)



Phosphorylated Histone H3 (0.16mm<sup>2</sup>)
